# Supplementary material for: Squamous cell carcinoma DNA detection using ultrabright SERS nanorattles and magnetic beads for head and neck cancer molecular diagnostics
Source: Royal Society of Chemistry journal article supplement (doi:10.1039/c7ay01913k), 2017-01-01

**Supplementary Figure 1: qPCR Amplification Curve for SCC and Thyroid Cell Lines.** SCC samples had Ct values ranging from 18-19. Thyroid sample Ct values were over 30.

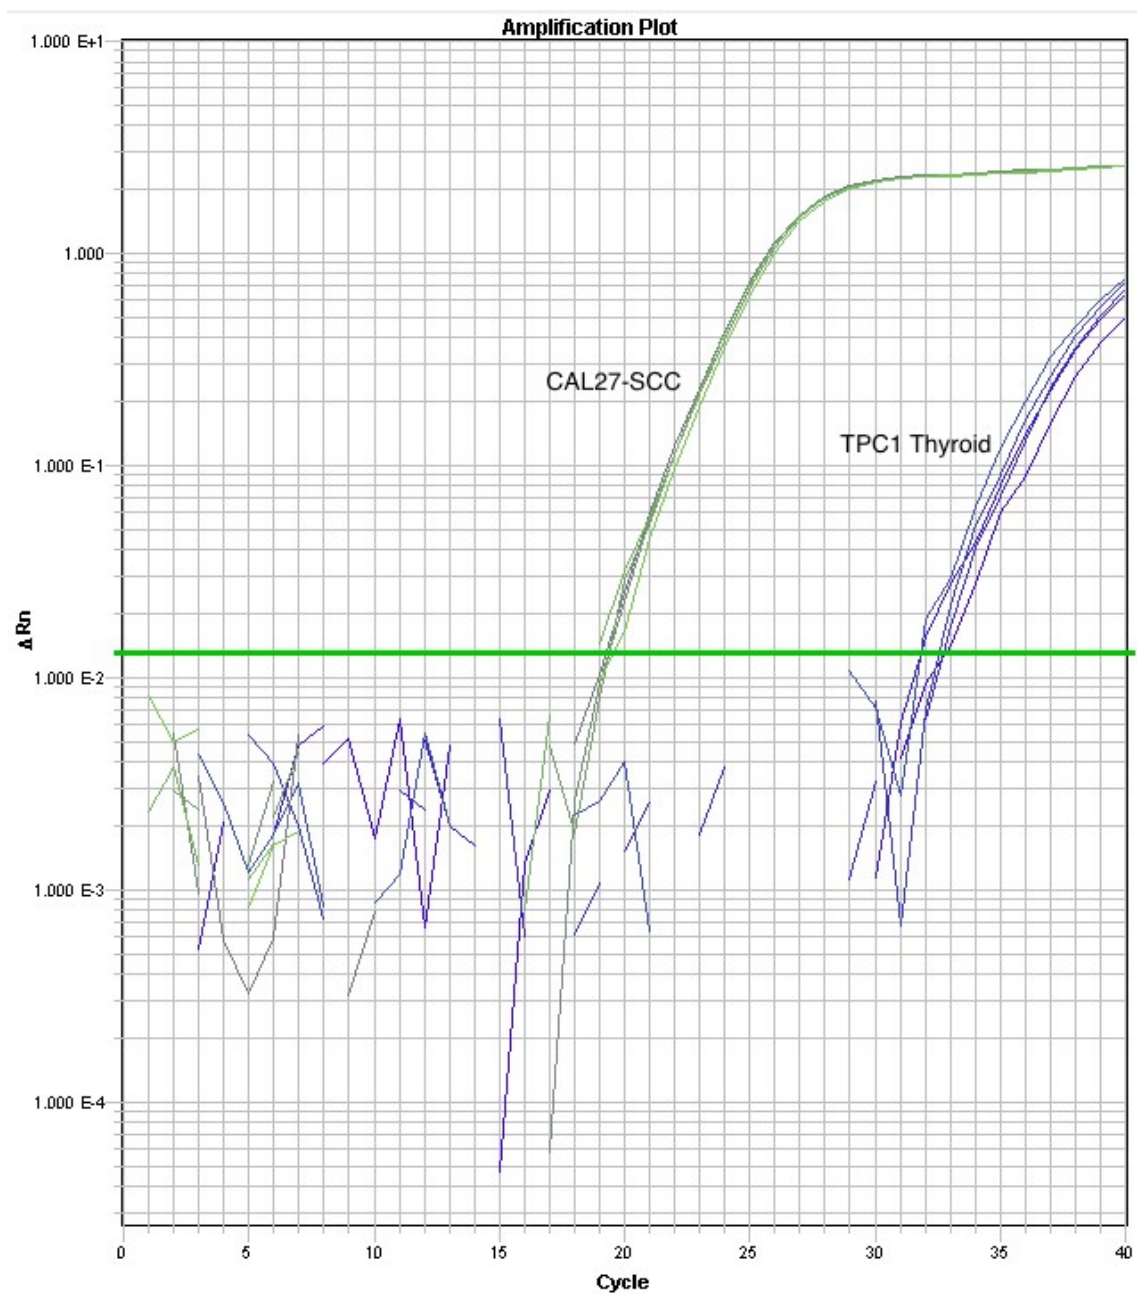

Supplement: c7ay01913k1.pdf [file c7ay01913k1.pdf]
